# Supplementary material
Source: ML conference proceedings conference paper supplement (https://openaccess.thecvf.com/content/CVPR2022/html/He_Cross_Domain_Object_CVPR_2022_paper.html)
Supplement: Supplementary file 1 [file He_Cross_Domain_Object_CVPR_2022_supplemental.pdf]

# Cross Domain Object Detection by Target-Perceived Dual Branch Distillation

Mengzhe He<sup>1,3</sup>, Yali Wang<sup>\*1,6</sup>, Jiayi Wu<sup>5</sup>, Yiru Wang<sup>2</sup>,

Hanqing Li<sup>2</sup>, Bo Li<sup>2</sup>, Weihao Gan<sup>2,4</sup>, Wei Wu<sup>2,4</sup>, Yu Qiao<sup>†1,4</sup>

<sup>1</sup> ShenZhen Key Lab of Computer Vision and Pattern Recognition, Shenzhen Institute of Advanced Technology, Chinese Academy of Sciences

<sup>2</sup> SenseTime Research <sup>3</sup> University of Chinese Academy of Science <sup>4</sup> Shanghai AI Laboratory, Shanghai, China

<sup>5</sup> Beihang University <sup>6</sup> SIAT Branch, Shenzhen Institute of Artificial Intelligence and Robotics for Society

{hemz, yl.wang, yu.qiao}@siat.ac.cn, wujiayi@buaa.edu.cn

{lihanqing, libo, wuwei}@senseauto.com, {wangyiru, ganweihao}@sensetime.com

## 1. Fourier Domain Image Transfer

$D^s = (x_i^s, y_i^s)$  is a source dataset, where  $x^s$  is an image and  $y^s$  is an annotation contains bounding boxes and categories information. Similarly  $D^t = (x_i^t, y_i^t)$  is a target dataset, where the ground truth annotations are absent. The domain transfer module in [5] are described below.

Let  $\mathcal{F}^A, \mathcal{F}^P : \mathbb{R}^{H \times W \times 3} \rightarrow \mathbb{R}^{H \times W \times 3}$  be the amplitude and phase components of the Fourier transform  $F$  of an RGB image, i.e., for a single channel image  $x$  we have:

$$F(x)(m, n) \sum_{h, w} x(h, w) e^{-j2\pi(\frac{h}{H}m + \frac{w}{W}n)}, j^2 = -1, \quad (1)$$

which can be implemented efficiently using the FFT algorithm in [1]. Accordingly,  $\mathcal{F}^{-1}$  is the inverse Fourier transform that maps spectral signals (phase and amplitude) back to the image space. We assume the center of the image is  $(0, 0)$ , a mask is defined as following:

$$M_\beta(h, w) = \mathbf{1}_{(h, w)} \in [-\beta H : \beta H, -\beta W : \beta W], \quad (2)$$

then the Fourier domain image transfer can be formalized as

$$x^{s \rightarrow t} = \mathcal{F}^{-1} \left( \left[ M_\beta \circ \mathcal{F}^A(x^t) + (1 - M_\beta) \circ \mathcal{F}^A(x^s), \mathcal{F}^P(x^s) \right] \right), \quad (3)$$

where the low frequency part of the amplitude of the source image  $F^A(x^s)$  is replaced by that of the target image  $x^t$ . Then, the modified spectral representation of  $x^s$ , with its phase component unaltered, is mapped back to the image  $x^{s \rightarrow t}$ , whose content is the same as  $x^s$ , but will resemble the appearance of a sample from  $D^t$ . By computing the (Fast) Fourier Transform (FFT) of each input image, and replacing the low-level frequencies of the  $x^t$  into the  $x^s$  before reconstituting the image for training via the inverse FFT (iFFT),

we can get a labeled image with target-like domain style. Smaller  $\beta$  will render the image  $x^{s \rightarrow t}$  similar with source image  $x^s$ . Larger  $\beta$  will make the image  $x^{s \rightarrow t}$  approach the target image  $x^t$ , but also exhibits visible artifacts. We choose  $\beta = 0.1$  for our three adaptation scenarios.

## 2. Position Embedding

In this section, we introduce the methods to get geometry similarity between two proposals in detail. Basically, it contains the following two steps. We denote  $\mathbf{B}_i$  and  $\mathbf{B}_j$  are bounding box prediction of proposal  $i$  and  $j$ . First, one can compute 4-dimensional relative geometry feature between  $\mathbf{B}_i$  and  $\mathbf{B}_j$ , which denoted as:

$$pos = \left( \log \left( \frac{|x_i - x_j|}{w_i} \right), \log \left( \frac{|y_i - y_j|}{h_i} \right), \log \left( \frac{w_j}{w_i} \right), \log \left( \frac{h_j}{h_i} \right) \right)^T, \quad (4)$$

where  $x$  and  $y$  are the center coordinates and  $w$  and  $h$  are the width and height of bounding boxes. Then cosine and sine functions are used to transform this feature as relative position embedding,

$$PE_{(pos, 2i)} = \sin(pos/1000^{2i/d_{model}}) \quad (5)$$

$$PE_{(pos, 2i+1)} = \cos(pos/1000^{2i/d_{model}}). \quad (6)$$

Second, an extra FC layer  $\mathcal{U}$  is used to project relative position embedding into a scalar weight, which refers to geometry similarity between  $\mathbf{B}_i$  and  $\mathbf{B}_j$ . Additionally, as shown in Eq.7 zero trimming in the max function is used to restrict position comparison between proposals that have geometric relations with high confidence.

$$\mathbf{U}_{i,j} = \max\{0, \mathcal{U}(\mathbf{B}_i, \mathbf{B}_j)\}, \quad (7)$$

\* Equal contribution. † Corresponding author.

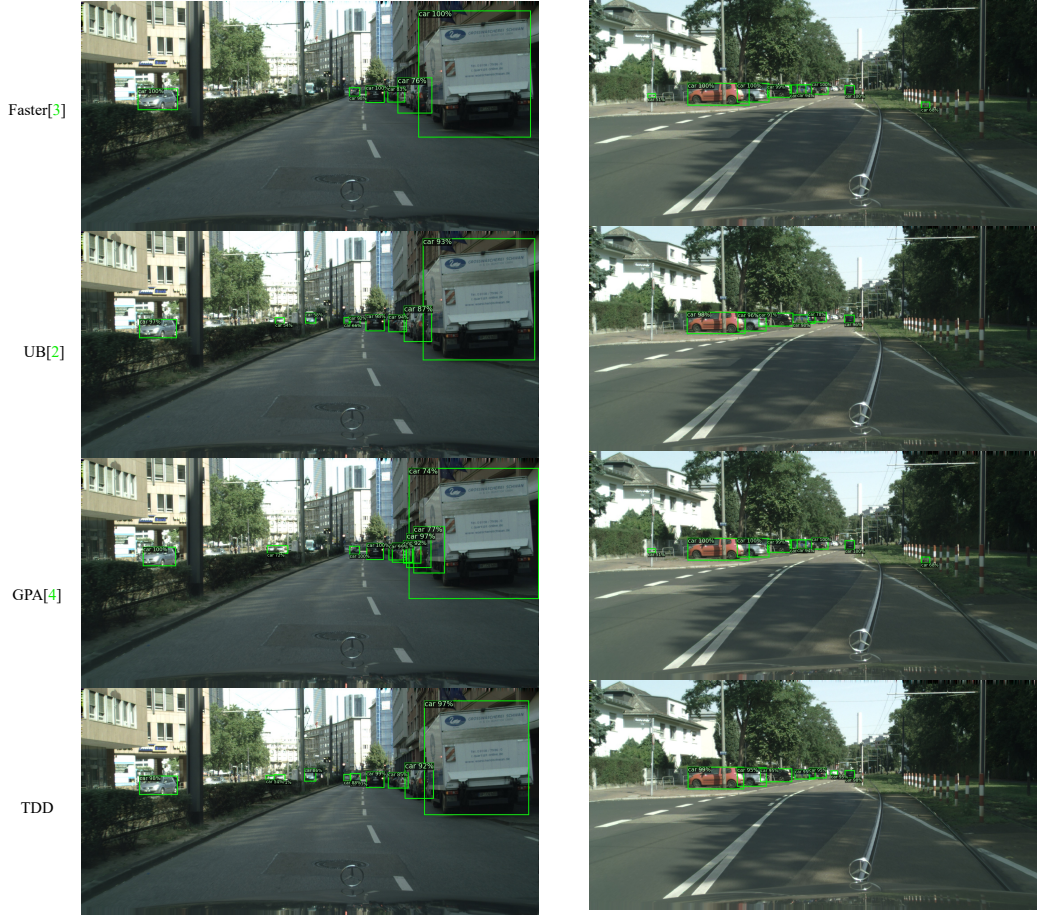

Figure 1. Car detection results of different methods for S→C experiments.

Table 1. Position Embedding Effectiveness

| Position Embedding | C→F  | S→C  | C→B  |
|--------------------|------|------|------|
| Without            | 48.3 | 62.9 | 43.3 |
| With               | 49.2 | 63.3 | 43.9 |

Table 2. Head Number Influence

| Head Number | C→F  | S→C  | C→B  |
|-------------|------|------|------|
| L=4         | 48.2 | 63.4 | 43.8 |
| L=8         | 47.7 | 62.5 | 43.9 |
| L=16        | 49.2 | 63.3 | 43.9 |

### 3. Ablation and Analysis

**Position Embedding.** We do ablation studies to see the effectiveness of position embedding. Results in Table 1 show that position embedding is needed in our network. The performance drops slightly when without the position embedding.

**Head Number.** For our cross attention module MHPCA, we try different head numbers. Table 2 shows that the head number slightly affects the result. Meanwhile, there are also different performance differences on each adaptation scenarios. We set head number=16 by default for our MHPCA module, as it performs well on all datasets.

**For the focal loss.** Table 3 shows our TDD experiment results with cross entropy. We only show the results of

Table 3. Results of CE loss.

| Arch | C→F  | S→C  |
|------|------|------|
| vgg  | 41.9 | 50.4 |
| r50  | 49.1 | 64.5 |

S→C and C→F. The results are comparable with focal loss and still surpass sota.

**Visualization** We show some detection results of Faster [3], GPA [4], UBT [2] and our TDD on S→C scenario in Figure 1. Only the common category car is reported. Our TDD gives more accurate predictions.

## 4. Codes and Models

Our code is based on the open-source implementation UBT [2] and the main codes are available in the annex. The detailed environment configuration and our models will be released afterwards.

## References

- [1] Matteo Frigo and Steven G Johnson. Fftw: An adaptive software architecture for the fft. In *Proceedings of the 1998 IEEE International Conference on Acoustics, Speech and Signal Processing, ICASSP'98 (Cat. No. 98CH36181)*, volume 3, pages 1381–1384. IEEE, 1998. 1
- [2] Yen-Cheng Liu, Chih-Yao Ma, Zijian He, Chia-Wen Kuo, Kan Chen, Peizhao Zhang, Bichen Wu, Zsolt Kira, and Peter Vajda. Unbiased teacher for semi-supervised object detection. In *International Conference on Learning Representations*, 2021. 2, 3
- [3] Shaoqing Ren, Kaiming He, Ross Girshick, and Jian Sun. Faster r-cnn: Towards real-time object detection with region proposal networks. *Advances in neural information processing systems*, 28:91–99, 2015. 2
- [4] Minghao Xu, Hang Wang, Bingbing Ni, Qi Tian, and Wenjun Zhang. Cross-domain detection via graph-induced prototype alignment. In *2020 IEEE/CVF Conference on Computer Vision and Pattern Recognition (CVPR)*, pages 12352–12361, 2020. 2
- [5] Yanchao Yang and Stefano Soatto. Fda: Fourier domain adaptation for semantic segmentation. In *2020 IEEE/CVF Conference on Computer Vision and Pattern Recognition (CVPR)*, pages 4084–4094, 2020. 1
